# Supplementary material for: Real-world use of polidocanol foam sclerotherapy for hemorrhoidal disease: insights from an international survey and systematic review with clinical practice recommendations
Source: Springer Nature journal article supplement (doi:10.1007/s13304-025-02258-2), 2025-06-06
Supplement: MOESM1 [file 13304_2025_2258_MOESM1_ESM.pdf]

**Quick statistics**

Survey 886488 'Sclerotherapy for Hemorrhoidal Disease'

Results

Survey 886488

|                                  |         |
|----------------------------------|---------|
| Number of records in this query: | 30      |
| Total records in survey:         | 30      |
| Percentage of total:             | 100.00% |

---

## Summary for Gender

Gender

---

| Answer      | Count | Percentage |
|-------------|-------|------------|
| Female (A1) | 5     | 16.67%     |
| Male (A2)   | 25    | 83.33%     |
| No answer   | 0     | 0.00%      |

---

## Summary for Age

Age range (years)

---

| Answer     | Count | Percentage |
|------------|-------|------------|
| 25-30 (A1) | 0     | 0.00%      |
| 31-40 (A2) | 3     | 10.00%     |
| 41-50 (A3) | 13    | 43.33%     |
| 51-60 (A4) | 11    | 36.67%     |
| 61-70 (A5) | 3     | 10.00%     |
| 71-80 (A6) | 0     | 0.00%      |
| No answer  | 0     | 0.00%      |

---

## Summary for Centre

Centre

---

| Answer            | Count | Percentage |
|-------------------|-------|------------|
| Academic (A1)     | 12    | 40.00%     |
| Teaching (A2)     | 12    | 40.00%     |
| Non teaching (A3) | 6     | 20.00%     |
| No answer         | 0     | 0.00%      |

## Summary for Specialty

## Specialty

| Answer                  | Count | Percentage |
|-------------------------|-------|------------|
| General surgery (A1)    | 4     | 13.33%     |
| Colorectal surgery (A2) | 16    | 53.33%     |
| Other                   | 10    | 33.33%     |
| No answer               | 0     | 0.00%      |

| ID | Response                                     |
|----|----------------------------------------------|
| 9  | gastroenterologist and surgical proctologist |
| 16 | gastroenterology                             |
| 20 | Anorectal surgery                            |
| 22 | Anorectal department                         |
| 23 | Angiology                                    |
| 24 | Proctology                                   |
| 27 | Gastroenterology                             |
| 35 | Anorectal surgery                            |
| 40 | Gastroenterologe                             |
| 52 | Proctology                                   |

## Summary for Indications

## Reasons for sclerotherapy use

|                                                                     |           |               |
|---------------------------------------------------------------------|-----------|---------------|
| <b>HD Goligher grade I</b>                                          | <b>23</b> | <b>76.67%</b> |
| HD Goligher grade II                                                | 27        | 90.00%        |
| HD Goligher grade III                                               | 18        | 60.00%        |
| HD Goligher grade IV                                                | 8         | 26.67%        |
| Ulcerative colitis                                                  | 1         | 3.33%         |
| Crohn's disease                                                     | 1         | 3.33%         |
| Pregnancy                                                           | 4         | 13.33%        |
| Elderly patients with multiple comorbidities                        | 23        | 76.67%        |
| Heart disease or patients on anticoagulant therapy or antiplatelets | 18        | 60.00%        |
| Bridge to surgery                                                   | 13        | 43.33%        |
| Associated with other office treatments (e.g. banding)              | 11        | 36.67%        |
| Associated with surgery for HD (e.g. excisional procedure)          | 9         | 30.00%        |
| Other                                                               | 1         | 3.33%         |

| ID | Response                                                                                                                                                   |
|----|------------------------------------------------------------------------------------------------------------------------------------------------------------|
| 2  | Efficacy demonstrated, Cost-effective, repeatable                                                                                                          |
| 9  | Best indication: bleedings                                                                                                                                 |
| 10 | good for bleeding                                                                                                                                          |
| 14 | Sclerotherapy can effectively alleviate the symptoms of hemorrhoids such as bleeding and protrusion, and it can also reduce the size of hemorrhoid nuclei. |
| 27 | Minimally invasive procedure with demonstrated safety and efficacy in this group of patients                                                               |
| 30 | ??????????                                                                                                                                                 |
| 31 | Bleeding persistent                                                                                                                                        |
| 32 | bleeding                                                                                                                                                   |
| 37 | With bleeding                                                                                                                                              |
| 43 | Liquid                                                                                                                                                     |
| 46 | In case of bleeding non responsive to medical treatment                                                                                                    |
| 49 | Sclerotherapy can reduce the size of hemorrhoids and effectively alleviate the symptoms of bleeding and protrusion caused by hemorrhoidal disease.         |
| 52 | Bleeding                                                                                                                                                   |
| 2  | Efficacy demonstrated, Cost-effective, repeatable                                                                                                          |
| 9  | Best indication: bleedings and little prolapse                                                                                                             |
| 10 | good for bleeding and mild prolapse                                                                                                                        |
| 14 | Sclerotherapy can effectively alleviate the symptoms of hemorrhoids such as bleeding and protrusion, and it can also reduce the size of hemorrhoid nuclei. |
| 27 | Minimally invasive procedure with demonstrated safety and efficacy in this group of patients                                                               |
| 30 | ??????????                                                                                                                                                 |
| 31 | Bleeding persistent                                                                                                                                        |
| 32 | bleeding                                                                                                                                                   |
| 37 | with bleeding or/and prolapse                                                                                                                              |
| 43 | Foam                                                                                                                                                       |
| 46 | In case of bleeding non responsive to medical treatment                                                                                                    |
| 49 | Sclerotherapy can reduce the size of hemorrhoids and effectively alleviate the symptoms of bleeding and protrusion caused by hemorrhoidal disease.         |
| 52 | Bleeding, prolapse                                                                                                                                         |
| 2  | Potentially effective (resolution Vs symptoms control)                                                                                                     |
| 14 | Sclerotherapy can effectively alleviate the symptoms of hemorrhoids such as bleeding and protrusion, and it can also reduce the size of hemorrhoid nuclei. |
| 27 | Minimally invasive procedure with demonstrated safety and efficacy in grade III selected patients                                                          |
| 30 | ??????????                                                                                                                                                 |
| 31 | Bleeding persistent in unfit for other treatment                                                                                                           |
| 32 | bleeding or bridge to surgery                                                                                                                              |
| 37 | with bleeding or/and prolapse                                                                                                                              |
| 49 | Sclerotherapy can reduce the size of hemorrhoids and effectively alleviate the symptoms of bleeding and protrusion caused by hemorrhoidal disease.         |
| 52 | Symptomatic with contraindications for LHP OR DGHAL                                                                                                        |

## Quick statistics

Survey 886488 'Sclerotherapy for Hemorrhoidal Disease'

|    |                                                                                                                                                                        |
|----|------------------------------------------------------------------------------------------------------------------------------------------------------------------------|
| 2  | As bridge to surgery or in frail bleeding patients with a high risk of complications in case of surgery                                                                |
| 14 | Sclerotherapy can effectively alleviate the symptoms of hemorrhoids such as bleeding and protrusion, and it can also reduce the size of hemorrhoid nuclei.             |
| 31 | Bleeding persistent in unfit for m-m                                                                                                                                   |
| 37 | After hemorrhoidectomy                                                                                                                                                 |
| 49 | Sclerotherapy can reduce the size of hemorrhoids and effectively alleviate the symptoms of bleeding and protrusion caused by hemorrhoidal disease.                     |
| 10 | safer than other treatment                                                                                                                                             |
| 14 | Sclerotherapy can help alleviate symptoms for pregnant women with hemorrhoids, and it is generally considered safe.                                                    |
| 49 | Sclerotherapy is safe, effective, minimally invasive, and causes little pain.                                                                                          |
| 2  | As bridge to surgery or in frail bleeding patients with a high risk of complications in case of surgery                                                                |
| 10 | safer than other treatment                                                                                                                                             |
| 20 | Security                                                                                                                                                               |
| 27 | Minimally invasive procedure with no apparent drug interactions                                                                                                        |
| 30 | ????????                                                                                                                                                               |
| 32 | operative risk                                                                                                                                                         |
| 37 | With bleeding                                                                                                                                                          |
| 38 | ????????????????????                                                                                                                                                   |
| 43 | Blood thinner                                                                                                                                                          |
| 46 | To avoid surgery                                                                                                                                                       |
| 2  | Effective with the chance to control symptoms without the risk of suspension (rebound hyper coagulability) or postoperative bleeding                                   |
| 10 | safer than other treatment                                                                                                                                             |
| 20 | Security                                                                                                                                                               |
| 27 | Minimally invasive procedure with demonstrated safety and efficacy in this group of patients; no need to stop antithrombotics                                          |
| 30 | ????????????????????                                                                                                                                                   |
| 38 | ????????????????????                                                                                                                                                   |
| 46 | To avoid surgery                                                                                                                                                       |
| 2  | Potential downstage of the disease to consent mini-invasiva treatment. Or useful to postpone surgery in exceptional circumstances (e.g. Pandemic)                      |
| 10 | more effective for bleeding symptoms                                                                                                                                   |
| 14 | Sclerotherapy can serve as a bridge between conservative treatment and surgery. Patients who do not respond to sclerotherapy may consider surgery.                     |
| 27 | Minimally invasive procedure with demonstrated efficacy in this group of patients                                                                                      |
| 32 | when the waiting list requires months                                                                                                                                  |
| 49 | Sclerotherapy can reduce the size of hemorrhoids and effectively alleviate the symptoms of bleeding and protrusion caused by hemorrhoidal disease.                     |
| 2  | Sclerobanding may theoretically improve both techniques with a synergic effect. Safety profile and feasibility already demonstrated in two pilot studies in literature |
| 20 | Preventing postoperative massive bleeding                                                                                                                              |
| 30 | ????????                                                                                                                                                               |
| 35 | Prevention of bleeding during sloughing of the hemorrhoids.                                                                                                            |
| 49 | After surgically removing larger hemorrhoids, smaller hemorrhoids can be treated with sclerotherapy.                                                                   |
| 52 | Rarely                                                                                                                                                                 |
| 14 | Large hemorrhoid nuclei can be surgically removed, while smaller ones can be treated with sclerotherapy.                                                               |
| 27 | I use it often, after surgery, when there is remaining hemorrhoidal pedicles                                                                                           |
| 49 | After surgically removing larger hemorrhoids, smaller hemorrhoids can be treated with sclerotherapy.                                                                   |
| 27 | Apparently safe in patients with hemorrhagic dyscrasia                                                                                                                 |

## Summary for Contraindications

Are there instances where you absolutely contraindicate sclerotherapy?

|                                     |           |               |
|-------------------------------------|-----------|---------------|
| <b>Active fissure</b>               | <b>13</b> | <b>43.33%</b> |
| Anal stenosis                       | 17        | 56.67%        |
| Anal abscess                        | 22        | 73.33%        |
| Special conditions (please specify) | 9         | 30.00%        |
| Other                               | 0         | 0.00%         |

| ID | Response                                                                                                                                    |
|----|---------------------------------------------------------------------------------------------------------------------------------------------|
| 27 | I always try to treat the fissure first                                                                                                     |
| 32 | infection risk                                                                                                                              |
| 46 | I first treat the fissure                                                                                                                   |
| 49 | The use of sclerotherapy for active fissure may increase the risk of complications.                                                         |
| 27 | Contraindicated only if it is not possible to perform anoscopy                                                                              |
| 32 | technical difficulties                                                                                                                      |
| 35 | Sclerotherapy will aggravate stenosis.                                                                                                      |
| 49 | Due to the lack of adequate visualization and operating space, sclerotherapy is not recommended for anal stenosis.                          |
| 14 | Sclerotherapy injections may increase the risk of anal infections, and it should be performed only after the infection has been eliminated. |
| 27 | I always try to treat the suppurative disease first                                                                                         |
| 30 | ????????????????                                                                                                                            |
| 32 | infection risk                                                                                                                              |
| 46 | Must treat the abscess first                                                                                                                |
| 49 | Using sclerotherapy for anal abscess has the risk of causing infection spread and is not recommended.                                       |
| 9  | anticoagulant therapy                                                                                                                       |
| 16 | perianal Crohn disease, infeccion, pain                                                                                                     |
| 27 | Active perineal or rectal Crohn's disease/ulcerative colitis                                                                                |
| 29 | pregnancy                                                                                                                                   |
| 37 | Bleeding too much but inoperable                                                                                                            |
| 38 | ????????????                                                                                                                                |
| 40 | Anal Crohn, infection, pain                                                                                                                 |
| 47 | acute inflammation or diseases of the anal region - chronic anorectal inflammatory diseases                                                 |
| 51 | Bleeding or prolapse                                                                                                                        |



## Summary for PreopRecomm

## Preoperative therapy recommendations

| None                     | 11 | 36.67% |
|--------------------------|----|--------|
| Stool softeners          | 15 | 50.00% |
| High-fiber diet          | 12 | 40.00% |
| Increased water intake   | 9  | 30.00% |
| Topical flavonoids       | 4  | 13.33% |
| Systemic flavonoids      | 11 | 36.67% |
| Topical corticosteroids  | 0  | 0.00%  |
| Systemic corticosteroids | 1  | 3.33%  |
| Other                    | 0  | 0.00%  |

| ID | Response                                                                                                                                                                     |
|----|------------------------------------------------------------------------------------------------------------------------------------------------------------------------------|
| 2  | Only in case of chronic constipation or usual hard stool evacuation                                                                                                          |
| 14 | Softening stool can avoid the spasms of anal sphincter muscles and the increase in local venous pressure caused by forced bowel movements.                                   |
| 27 | To reduce defecation straining                                                                                                                                               |
| 32 | always                                                                                                                                                                       |
| 35 | Reduce defecation discomfort                                                                                                                                                 |
| 38 | ???????                                                                                                                                                                      |
| 49 | Adjusting diet and developing good bowel habits are beneficial for any type of hemorrhoidal disease.                                                                         |
| 14 | It can help to form a good defecation habits.                                                                                                                                |
| 27 | To reduce defecation straining                                                                                                                                               |
| 35 | Reduce defecation discomfort                                                                                                                                                 |
| 49 | Adjusting diet and developing good bowel habits are beneficial for any type of hemorrhoidal disease.                                                                         |
| 14 | It can help to form a good defecation habits.                                                                                                                                |
| 27 | To reduce defecation straining                                                                                                                                               |
| 32 | always                                                                                                                                                                       |
| 38 | ?????????                                                                                                                                                                    |
| 49 | Adjusting diet and developing good bowel habits are beneficial for any type of hemorrhoidal disease.                                                                         |
| 27 | Drugs apparently effective in the symptomatic treatment of hemorrhoidal disease; prior treatment helps to understand whether there is really an indication for sclerotherapy |
| 2  | Only in case of severe symptoms                                                                                                                                              |
| 14 | It can effectively reduce the symptoms of hemorrhoid edema and bleeding.                                                                                                     |
| 23 | Ffpm                                                                                                                                                                         |
| 27 | Drugs apparently effective in the symptomatic treatment of hemorrhoidal disease; prior treatment helps to understand whether there is really an indication for sclerotherapy |
| 32 | always                                                                                                                                                                       |
| 49 | Flavonoid medications can effectively improve the symptoms of bleeding and edema associated with hemorrhoidal disease.                                                       |
| 49 | Corticosteroids can be effective in reducing inflammatory reactions and relieving pain.                                                                                      |

## Summary for DurationPreopTherapy

## Duration of preoperative therapy

| Answer        | Count | Percentage |
|---------------|-------|------------|
| (A2)          | 9     | 47.37%     |
| 2 weeks (A3)  | 3     | 15.79%     |
| 4 weeks (A4)  | 6     | 31.58%     |
| 6 weeks (A5)  | 1     | 5.26%      |
| 8 weeks (A6)  | 0     | 0.00%      |
| >8 weeks (A7) | 0     | 0.00%      |
| Other         | 0     | 0.00%      |
| No answer     | 0     | 0.00%      |

| ID | Response |
|----|----------|
|----|----------|

## Summary for Preparation

## Patients preparation

| Answer                                                               | Count | Percentage |
|----------------------------------------------------------------------|-------|------------|
| Single enema a few hours before the procedure (SQ001)                | 17    | 56.67%     |
| Enemas the night before and a few hours before the procedure (SQ002) | 5     | 16.67%     |
| None (SQ003)                                                         | 10    | 33.33%     |
| Other                                                                | 1     | 3.33%      |

| ID | Response                            |
|----|-------------------------------------|
| 40 | Usual fisiológico defecation before |

---

## Summary for Position

What's your preferred and most used patient's position for sclerotherapy?

---

| Answer                        | Count | Percentage |
|-------------------------------|-------|------------|
| Sims - left lateral (A1)      | 16    | 53.33%     |
| Lloyd Davies / lithotomy (A2) | 7     | 23.33%     |
| Jack-knife - prone (A3)       | 5     | 16.67%     |
| Other                         | 2     | 6.67%      |
| No answer                     | 0     | 0.00%      |

| ID | Response                                  |
|----|-------------------------------------------|
| 16 | left lateral position wih flexion of legs |

---

## Summary for Setting

### Main setting for sclerotherapy

---

| Answer           | Count | Percentage |
|------------------|-------|------------|
| Office (A1)      | 16    | 53.33%     |
| Day surgery (A2) | 9     | 30.00%     |
| Inpatient (A3)   | 5     | 16.67%     |
| Other            | 0     | 0.00%      |
| No answer        | 0     | 0.00%      |

| ID | Response |
|----|----------|
|----|----------|

---

Summary for Percentage

Percentage of polidocanol used

---

| Answer    | Count | Percentage |
|-----------|-------|------------|
| 3% (A1)   | 17    | 65.38%     |
| 2% (A2)   | 2     | 7.69%      |
| 1% (A3)   | 7     | 26.92%     |
| Other     | 0     | 0.00%      |
| No answer | 0     | 0.00%      |

| ID | Response |
|----|----------|
|----|----------|

---

## Summary for Type

### Sclerotherapy method

---

| Answer               | Count | Percentage |
|----------------------|-------|------------|
| Transanal only (A1)  | 24    | 80.00%     |
| Endoscopic only (A2) | 0     | 0.00%      |
| Both methods (A3)    | 6     | 20.00%     |
| No answer            | 0     | 0.00%      |

---

## Summary for Anoscope

Transanal with anoscope?

---

| Answer    | Count | Percentage |
|-----------|-------|------------|
| Yes (A1)  | 30    | 100.00%    |
| No (A2)   | 0     | 0.00%      |
| No answer | 0     | 0.00%      |



## Summary for FoamFormation

## Foam formation method in clinical practice

| Answer                                | Count | Percentage |
|---------------------------------------|-------|------------|
| Tessari (A1)                          | 12    | 46.15%     |
| Automated device (e.g., Varixio) (A2) | 2     | 7.69%      |
| EasyFoam Kit (A3)                     | 10    | 38.46%     |
| Variable (A4)                         | 0     | 0.00%      |
| Other                                 | 2     | 7.69%      |
| No answer                             | 0     | 0.00%      |

| ID | Response                                         |
|----|--------------------------------------------------|
| 16 | 3-way tap and 2 syringe 20 cc                    |
| 40 | 3 way tap and 2 seringues immediately before inj |

## Summary for CaliberNeedle

## Gauge of needle used

| Answer     | Count | Percentage |
|------------|-------|------------|
| 17 G (A2)  | 2     | 6.67%      |
| 18 G (A3)  | 2     | 6.67%      |
| 19 G (A4)  | 0     | 0.00%      |
| 20 G (A5)  | 7     | 23.33%     |
| 21 G (A6)  | 1     | 3.33%      |
| 22 G (A7)  | 5     | 16.67%     |
| 23 G (A8)  | 4     | 13.33%     |
| 24 G (A9)  | 3     | 10.00%     |
| 25 G (A10) | 3     | 10.00%     |
| 26 G (A11) | 0     | 0.00%      |
| Other      | 3     | 10.00%     |
| No answer  | 0     | 0.00%      |

| ID | Response |
|----|----------|
| 16 | green iv |
| 22 | 1ml      |
| 40 | Iv green |

## Summary for Anesthesia

## Type of anesthesia used

| Answer                                       | Count | Percentage |
|----------------------------------------------|-------|------------|
| None (A1)                                    | 15    | 50.00%     |
| Topical anesthetic (e.g. lidocaine gel) (A2) | 9     | 30.00%     |
| Injection of local anesthetic (A3)           | 1     | 3.33%      |
| Sedation (A4)                                | 0     | 0.00%      |
| Spinal anesthesia (A5)                       | 5     | 16.67%     |
| Other                                        | 0     | 0.00%      |
| No answer                                    | 0     | 0.00%      |

| ID | Response |
|----|----------|
|----|----------|

## Summary for InjectionTarget

Injection target of sclerosing agent

| Answer                  | Count | Percentage |
|-------------------------|-------|------------|
| Mucosal/submucosal (A2) | 10    | 33.33%     |
| Intra-hemorrhoidal (A3) | 19    | 63.33%     |
| Other                   | 1     | 3.33%      |
| No answer               | 0     | 0.00%      |

| ID | Response |
|----|----------|
| 52 | Both     |

## Summary for VolumeAgent

Volume of sclerosing agent administered per pile (NB for foam, refer to total volume air+agent injected)

| Answer       | Count | Percentage |
|--------------|-------|------------|
| 2 ml (A2)    | 20    | 66.67%     |
| 3 ml (A3)    | 5     | 16.67%     |
| 4 ml (A4)    | 1     | 3.33%      |
| 5-10 ml (A5) | 4     | 13.33%     |
| Comments     | 8     | 26.67%     |
| No answer    | 0     | 0.00%      |

| ID | Response                                                                            |
|----|-------------------------------------------------------------------------------------|
| 8  | 1 ml anterior quadrant                                                              |
| 9  | Limited quantity                                                                    |
| 10 | above the pile 2-3ml<br>pile 2-3ml                                                  |
| 14 | range of 2-3 ml                                                                     |
| 16 | Depending of plasticity of hemorrhoidal cushion - in between 10 and 30 ml           |
| 27 | The volume depends on the resistance felt during the instillation of the sclerosant |
| 32 | for anterior piles 1/1.5 ml                                                         |
| 52 | Always foam, sometimes less than 2ml/pile                                           |

## Summary for TotalVolume

Maximum volume of sclerosing agent administered per treatment

| Answer      | Count | Percentage |
|-------------|-------|------------|
| 6 ml (A2)   | 8     | 26.67%     |
| 8 ml (A3)   | 3     | 10.00%     |
| 10 ml (A4)  | 10    | 33.33%     |
| 12 ml (A5)  | 4     | 13.33%     |
| 14 ml (A6)  | 1     | 3.33%      |
| 16 ml (A7)  | 0     | 0.00%      |
| 18 ml (A8)  | 0     | 0.00%      |
| 20+ ml (A9) | 4     | 13.33%     |
| Comments    | 3     | 10.00%     |
| No answer   | 0     | 0.00%      |

| ID | Response                                                      |
|----|---------------------------------------------------------------|
| 10 | usually less than 10ml when accompany with other HD treatment |
| 14 | range of 10-15 ml                                             |
| 16 | 40 ml                                                         |

## Summary for Adjustements

## Adjustment of agent volume based on hemorrhoidal disease grade

| Answer                                           | Count | Percentage |
|--------------------------------------------------|-------|------------|
| Yes (A1)                                         | 25    | 83.33%     |
| No, I always administer a standard quantity (A2) | 5     | 16.67%     |
| Comments                                         | 3     | 10.00%     |
| No answer                                        | 0     | 0.00%      |

| ID | Response                                                                                                                                |
|----|-----------------------------------------------------------------------------------------------------------------------------------------|
| 14 | The dosage of sclerosing agent is determined based on the size and severity of the hemorrhoid.                                          |
| 27 | The volume depends on the resistance felt during the instillation of the sclerosant; Often more advanced degrees require larger volumes |
| 49 | For larger hemorrhoids, the injection dose can be appropriately increased during sclerotherapy.                                         |

## Summary for NumberOfPiles

## Number of piles treated per session

| Answer                                  | Count | Percentage |
|-----------------------------------------|-------|------------|
| 1 (A1)                                  | 1     | 3.33%      |
| 2 (A2)                                  | 1     | 3.33%      |
| 3 (A3)                                  | 16    | 53.33%     |
| >3 if other bleeding areas evident (A4) | 12    | 40.00%     |
| Comments                                | 4     | 13.33%     |
| No answer                               | 0     | 0.00%      |

| ID | Response                                                                                                                                     |
|----|----------------------------------------------------------------------------------------------------------------------------------------------|
| 14 | Too many injection sites may lead to complications such as anal stenosis.                                                                    |
| 27 | Normally 1 or 2 pyles since we believe that, when injecting large volumes, the sclerosant disperses throughout the hemorrhoidal territory    |
| 32 | it depends on the clinical scenario                                                                                                          |
| 49 | Single injection treatment should not exceed 3 piles and the total dosage should not exceed the recommended dose stated in the instructions. |



## Summary for PostopRecomm

## Postoperative therapy recommendations

| None                     | 2  | 6.67%  |
|--------------------------|----|--------|
| Stool softeners          | 23 | 76.67% |
| High-fiber diet          | 16 | 53.33% |
| Increased water intake   | 20 | 66.67% |
| Topical flavonoids       | 1  | 3.33%  |
| Systemic flavonoids      | 17 | 56.67% |
| Topical corticosteroids  | 0  | 0.00%  |
| Systemic corticosteroids | 2  | 6.67%  |
| Other                    | 3  | 10.00% |

| ID | Response                                                                                                               |
|----|------------------------------------------------------------------------------------------------------------------------|
| 40 | Laxative if need, paracetamol for pain if need, hemorrhoids ointment without corticoids                                |
| 10 | lactulose                                                                                                              |
| 14 | It helps to cultivate a good defecation habit.                                                                         |
| 27 | Whenever necessary; with the aim of reducing defecatory straining                                                      |
| 32 | always                                                                                                                 |
| 35 | Adjusting bowel movements to accelerate recovery                                                                       |
| 43 | Mucofalk                                                                                                               |
| 49 | Adjusting diet and developing good bowel habits are beneficial for any type of hemorrhoidal disease.                   |
| 14 | It helps to cultivate a good defecation habit.                                                                         |
| 27 | Whenever necessary; with the aim of reducing defecatory straining                                                      |
| 35 | Adjusting bowel movements to accelerate recovery                                                                       |
| 49 | Adjusting diet and developing good bowel habits are beneficial for any type of hemorrhoidal disease.                   |
| 14 | It helps to cultivate a good defecation habit.                                                                         |
| 27 | Whenever necessary; with the aim of reducing defecatory straining                                                      |
| 35 | Adjusting bowel movements to accelerate recovery                                                                       |
| 38 | ????                                                                                                                   |
| 49 | Adjusting diet and developing good bowel habits are beneficial for any type of hemorrhoidal disease.                   |
| 27 | I use it per protocol, although recognizing that there is no scientific evidence for its use                           |
| 2  | Diosmine 500 mg twice a day X 15 days, then once a day for the following 15 days                                       |
| 14 | It can effectively reduce the symptoms of hemorrhoid edema and bleeding.                                               |
| 27 | I use it per protocol, although recognizing that there is no scientific evidence for its use                           |
| 32 | always                                                                                                                 |
| 49 | Flavonoid medications can effectively improve the symptoms of bleeding and edema associated with hemorrhoidal disease. |
| 49 | Corticosteroids can be effective in reducing inflammatory reactions and relieving pain.                                |
| 9  | paracetamol                                                                                                            |
| 16 | occasionally antibiotic                                                                                                |
| 40 | Paracetamol for pain and topic hemorrhoids ointment without corticoid                                                  |

## Summary for DurationPostopTherap

## Duration of postoperative therapy

| Answer        | Count | Percentage |
|---------------|-------|------------|
| (A2)          | 10    | 35.71%     |
| 2 weeks (A3)  | 9     | 32.14%     |
| 4 weeks (A4)  | 8     | 28.57%     |
| 6 weeks (A5)  | 1     | 3.57%      |
| 8 weeks (A6)  | 0     | 0.00%      |
| >8 weeks (A7) | 0     | 0.00%      |
| Other         | 0     | 0.00%      |
| No answer     | 0     | 0.00%      |

| ID | Response |
|----|----------|
|----|----------|

---

## Summary for SecondSession

Do you routinely schedule a second sclerotherapy session?

---

| Answer    | Count | Percentage |
|-----------|-------|------------|
| Yes (A1)  | 7     | 23.33%     |
| No (A2)   | 23    | 76.67%     |
| No answer | 0     | 0.00%      |

## Summary for CriteriaSecond

## Criteria indicating the need for a second session

| Answer                                                     | Count | Percentage |
|------------------------------------------------------------|-------|------------|
| Not applicable as I never do a second session (A1)         | 2     | 6.67%      |
| Symptoms or Patient-reported outcome measures (PROMs) (A2) | 23    | 76.67%     |
| Patient's clinical diary (A3)                              | 5     | 16.67%     |
| Comments                                                   | 3     | 10.00%     |
| No answer                                                  | 0     | 0.00%      |

| ID | Response                                                                                                                                                                                          |
|----|---------------------------------------------------------------------------------------------------------------------------------------------------------------------------------------------------|
| 14 | Patients who experience recurrence after the first sclerotherapy treatment can consider undergoing sclerotherapy again.                                                                           |
| 27 | I usually schedule a reassessment in 1 to 2 months; if the patient maintains hemorrhoidal symptoms and anoscopy reveals significant hemorrhoidal disease, a second treatment session is performed |
| 49 | If sclerotherapy is effective and the patient requests, a second treatment can be scheduled.                                                                                                      |

## Summary for Timeframe

Minimum interval from first to second sclerotherapy treatment (if necessary)

| Answer       | Count | Percentage |
|--------------|-------|------------|
| 1 week (A2)  | 1     | 3.33%      |
| 2 weeks (A3) | 3     | 10.00%     |
| 3 weeks (A4) | 1     | 3.33%      |
| 4 weeks (A5) | 15    | 50.00%     |
| 5 weeks (A6) | 1     | 3.33%      |
| 6 weeks (A7) | 4     | 13.33%     |
| 7 weeks (A8) | 0     | 0.00%      |
| 8 weeks (A9) | 4     | 13.33%     |
| Other        | 1     | 3.33%      |
| No answer    | 0     | 0.00%      |

| ID | Response |
|----|----------|
| 22 | 12 weeks |

## Summary for Efficacy

## Efficacy assessment methods

| PROMs (include scores used: HDSS-SHS-Giamundo-Sodergreen-Vaizey-others) | 12 | 40.00% |
|-------------------------------------------------------------------------|----|--------|
| Anoscopy                                                                | 20 | 66.67% |
| Hemoglobin levels                                                       | 6  | 20.00% |
| Patient's subjective experience                                         | 24 | 80.00% |
| Other                                                                   | 0  | 0.00%  |

| ID | Response                                                                                                                                                                                     |
|----|----------------------------------------------------------------------------------------------------------------------------------------------------------------------------------------------|
| 14 | This method is more suitable for patients with hemorrhoids.                                                                                                                                  |
| 27 | HDSS                                                                                                                                                                                         |
| 32 | to be administered to all patients                                                                                                                                                           |
| 49 | The treatment effect should be comprehensively evaluated from several aspects, including symptom improvement, patient experience, and objective examination.                                 |
| 16 | Only if the patient keeps blood and prolapse                                                                                                                                                 |
| 27 | I only apply treatment if the hemorrhoidal pyles allow it (sometimes the fibrosis resulting from previous treatments reduces vascular compliance; I always use intra-hemorrhoidal injection) |
| 32 | performed during follow-up                                                                                                                                                                   |
| 38 | ????????????                                                                                                                                                                                 |
| 49 | The treatment effect should be comprehensively evaluated from several aspects, including symptom improvement, patient experience, and objective examination.                                 |
| 2  | In case of severe anemia                                                                                                                                                                     |
| 38 | ????????????                                                                                                                                                                                 |
| 27 | I only treat patients who are symptomatic, even if significant hemorrhoidal disease is identified during anoscopy                                                                            |
| 32 | diary                                                                                                                                                                                        |
| 38 | ????????????                                                                                                                                                                                 |
| 49 | The treatment effect should be comprehensively evaluated from several aspects, including symptom improvement, patient experience, and objective examination.                                 |
| 52 | Presisting / recurrent symtoms                                                                                                                                                               |

## Summary for FupTiming

## Minimum follow-up timing after sclerotherapy session

| Answer       | Count | Percentage |
|--------------|-------|------------|
| 1 day (A2)   | 3     | 10.00%     |
| 2 days (A3)  | 0     | 0.00%      |
| 3 days (A4)  | 1     | 3.33%      |
| 5 days (A5)  | 0     | 0.00%      |
| 7 days (A6)  | 10    | 33.33%     |
| 15 days (A7) | 5     | 16.67%     |
| 30 days (A8) | 10    | 33.33%     |
| Other        | 1     | 3.33%      |
| No answer    | 0     | 0.00%      |

| ID | Response                                                                                            |
|----|-----------------------------------------------------------------------------------------------------|
| 52 | Usually 8 weeks, unless any unusual symptoms like pain, fever, severe bleeding - in thatcases ASAP. |

Summary for FupMethods

Follow-up methodology

| Answer         | Count | Percentage |
|----------------|-------|------------|
| Remote (A1)    | 4     | 13.33%     |
| In-person (A2) | 26    | 86.67%     |
| Other          | 0     | 0.00%      |
| No answer      | 0     | 0.00%      |

| ID | Response |
|----|----------|
|----|----------|
